# Supplementary material
Source: publisher figshare collection journal article supplement (https://frontiersin.figshare.com/ndownloader/files/22243560)
Supplement: Supplementary file 1 [file 22243560]

## Supplementary Material

### 1.1 Supplementary Figures

**Table 1** Number of Kemp's ridleys nests confirmed along the South Texas Gulf Coast from 2009-2012.

| Year | North Padre Island | South Padre Island |
|------|--------------------|--------------------|
| 2009 | 117                | 33                 |
| 2010 | 74                 | 28                 |
| 2011 | 117                | 39                 |
| 2012 | 106                | 59                 |

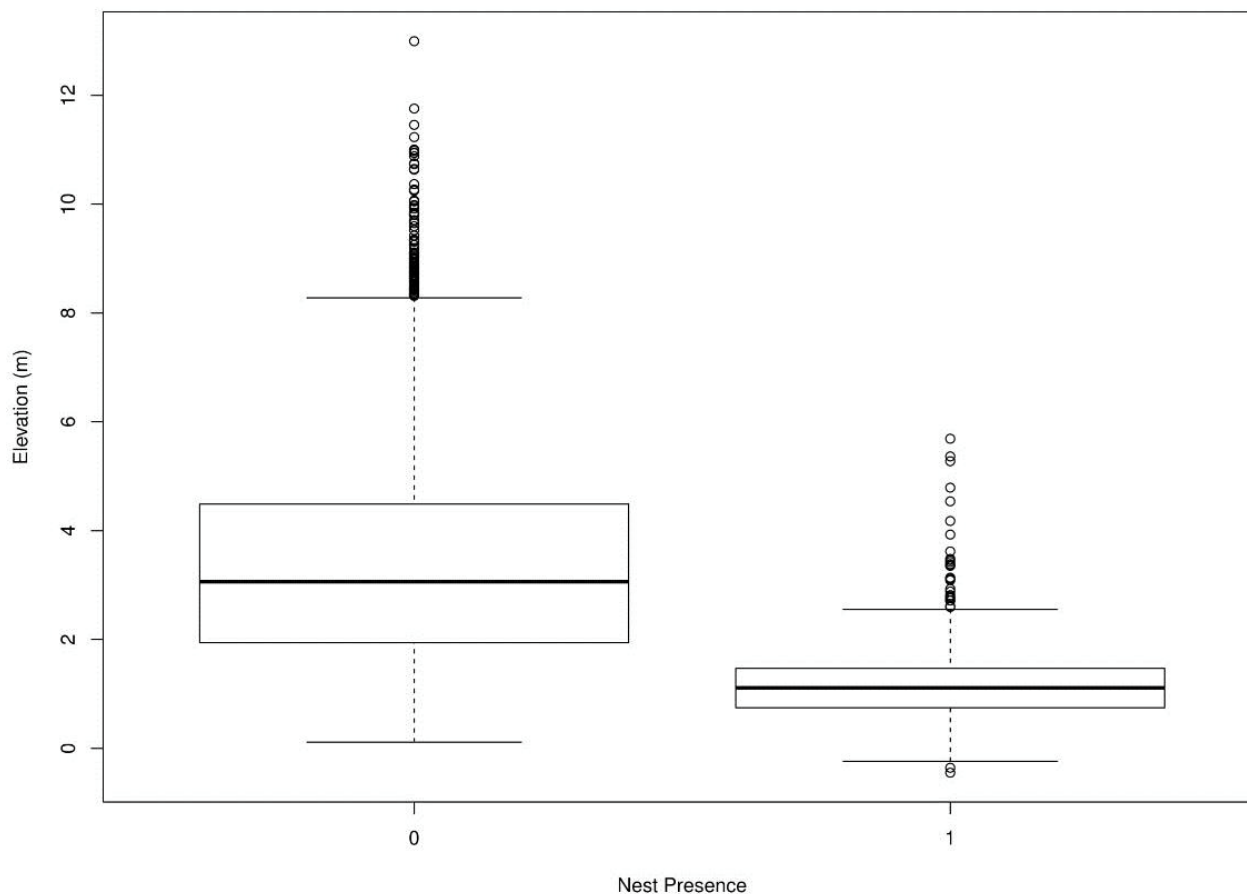

**Figure 1** Boxplot of elevation (m) differentiated by background (0) and nest presence (1) data.

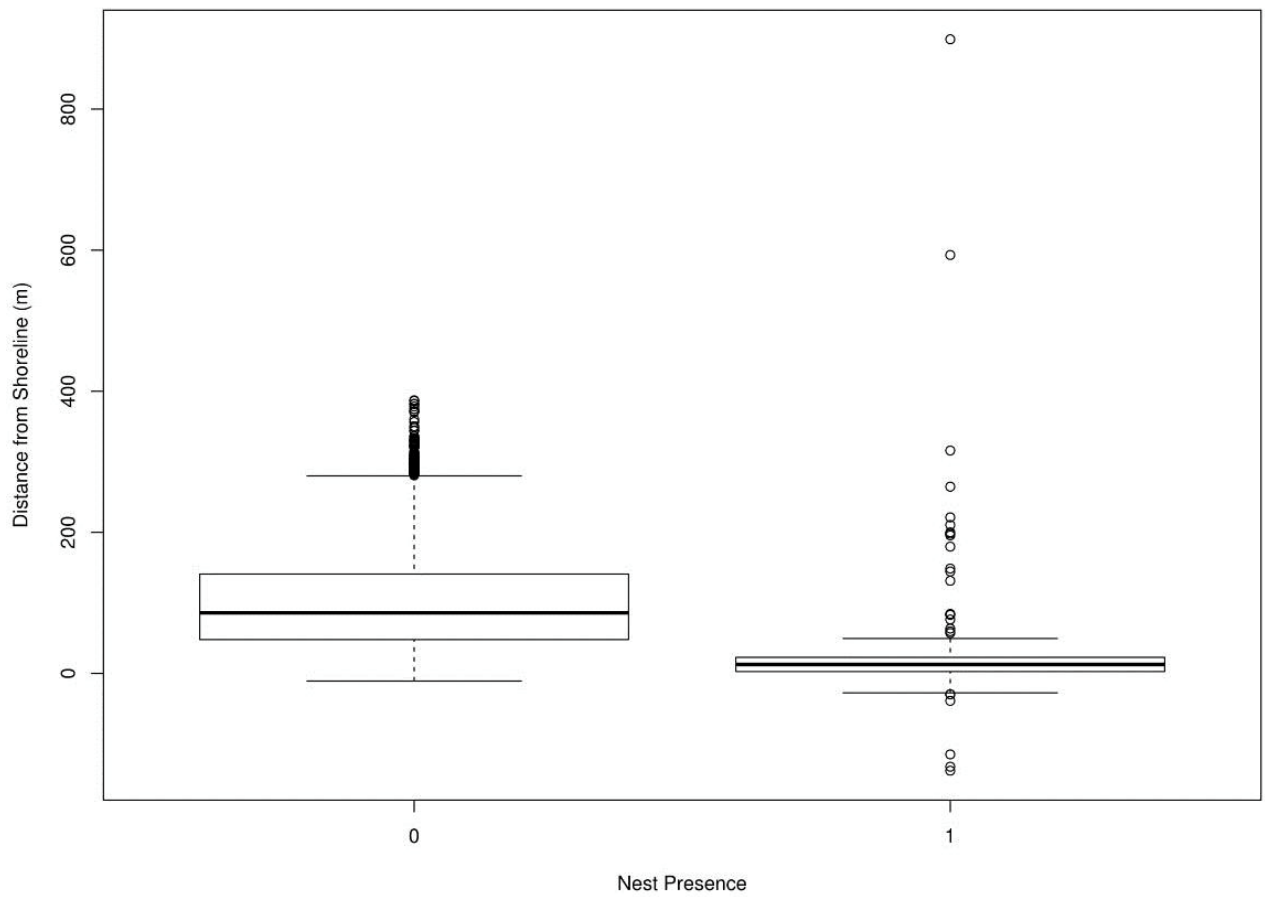

**Figure 2** Boxplot of distance from shoreline (m) differentiated by background (0) and nest presence (1) data.

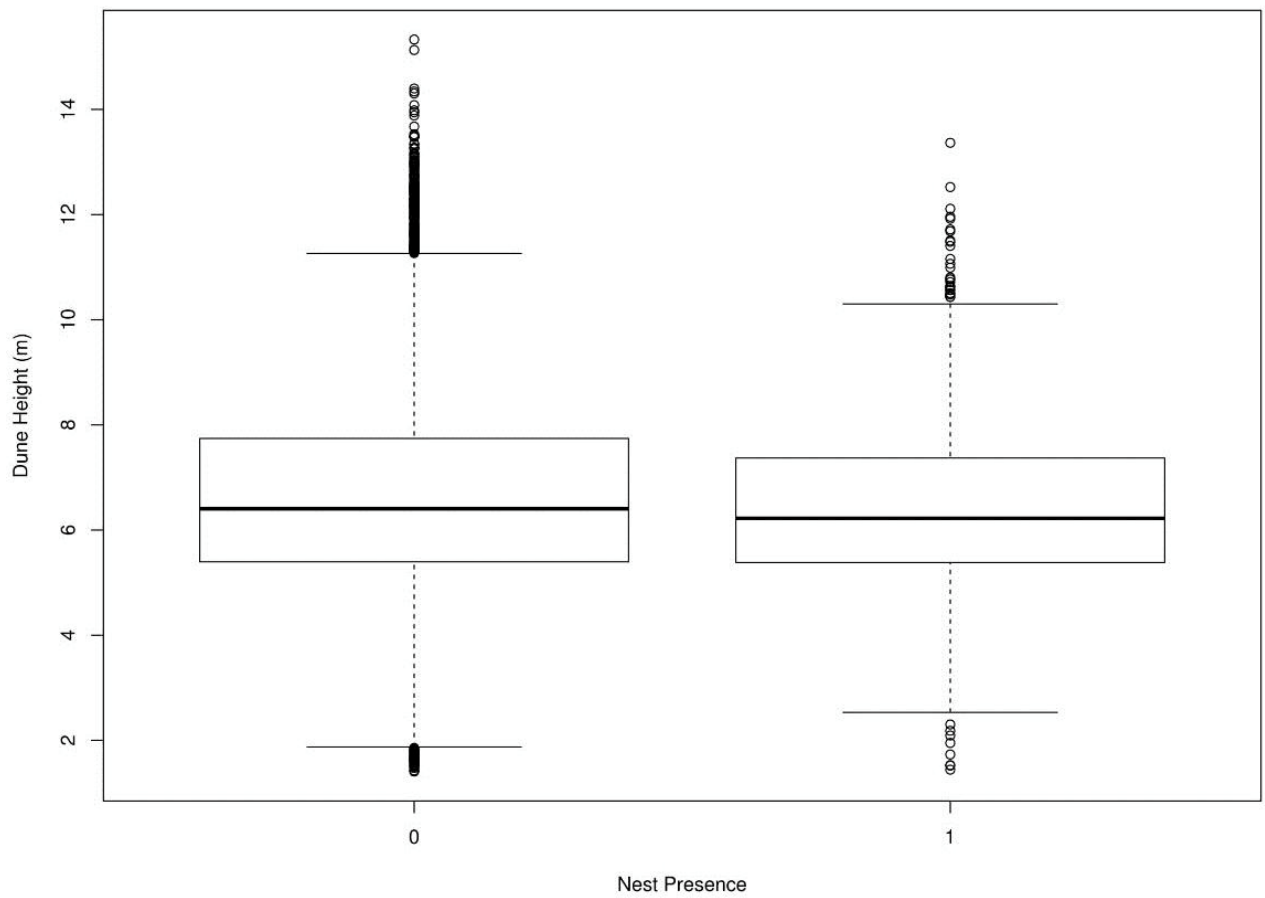

**Figure 3** Boxplot of dune height (m) differentiated by background (0) and nest presence (1) data.

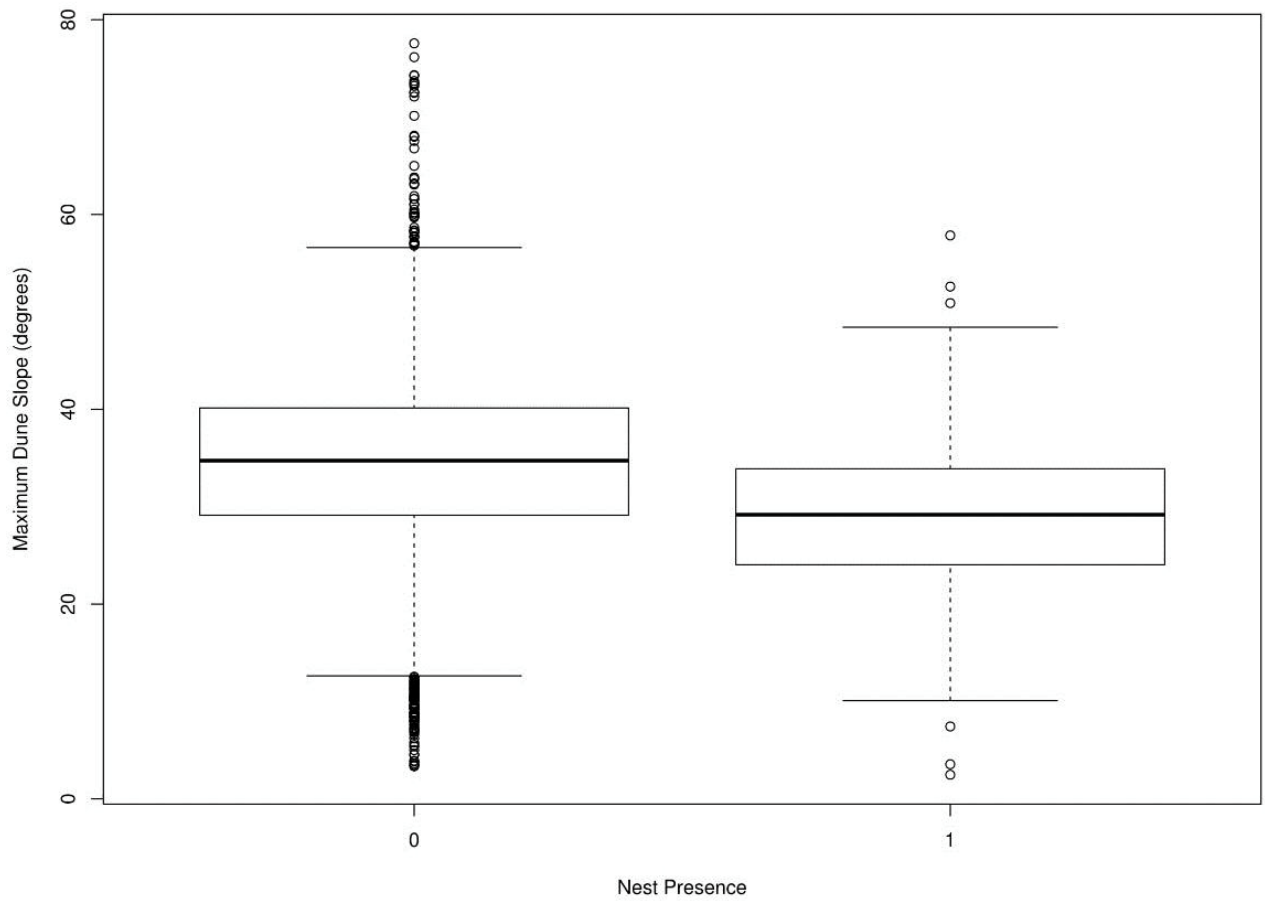

**Figure 4** Boxplot of maximum dune slope (degrees) differentiated by background (0) and nest presence (1) data.

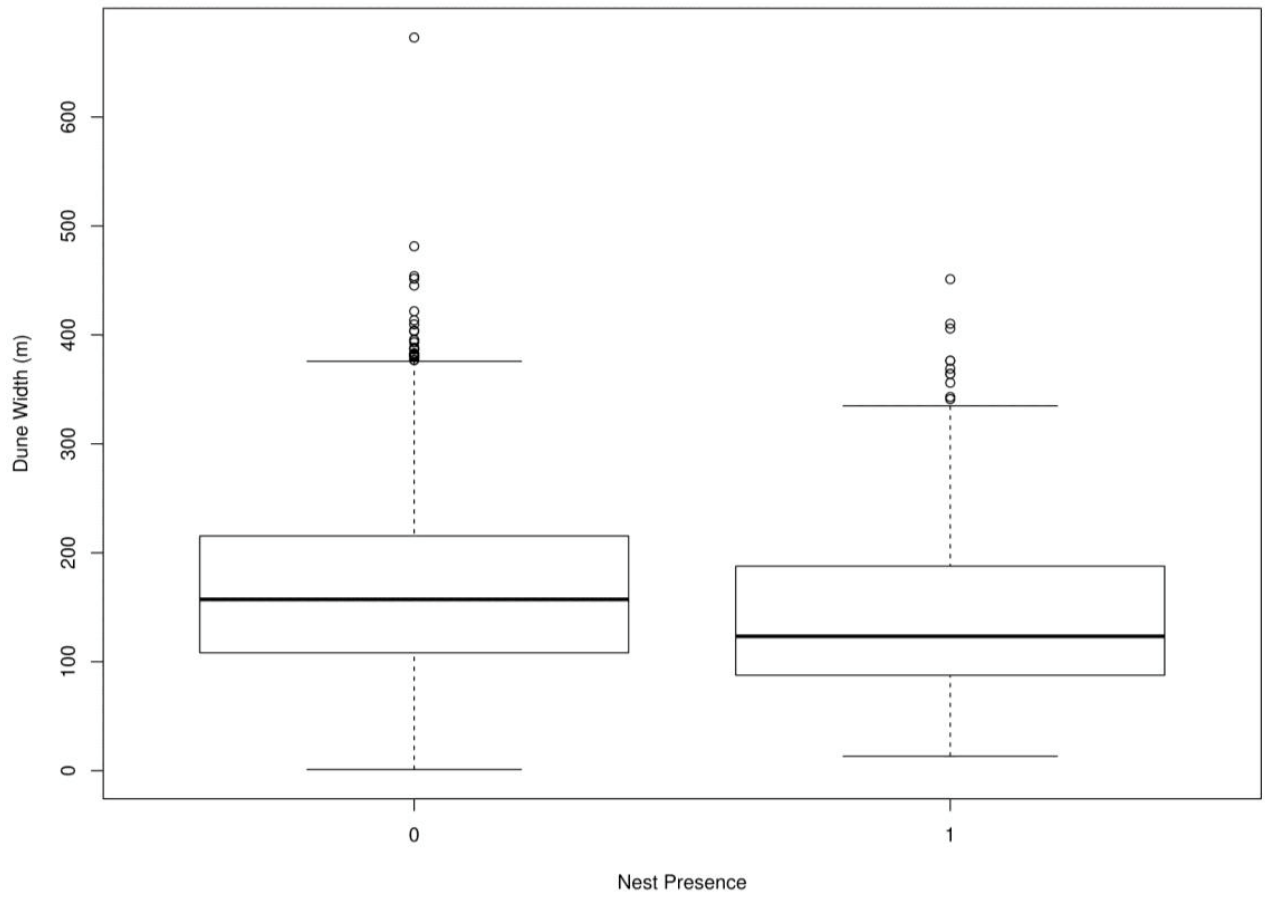

**Figure 5** Boxplot of dune width (m) differentiated by background (0) and nest presence (1) data.

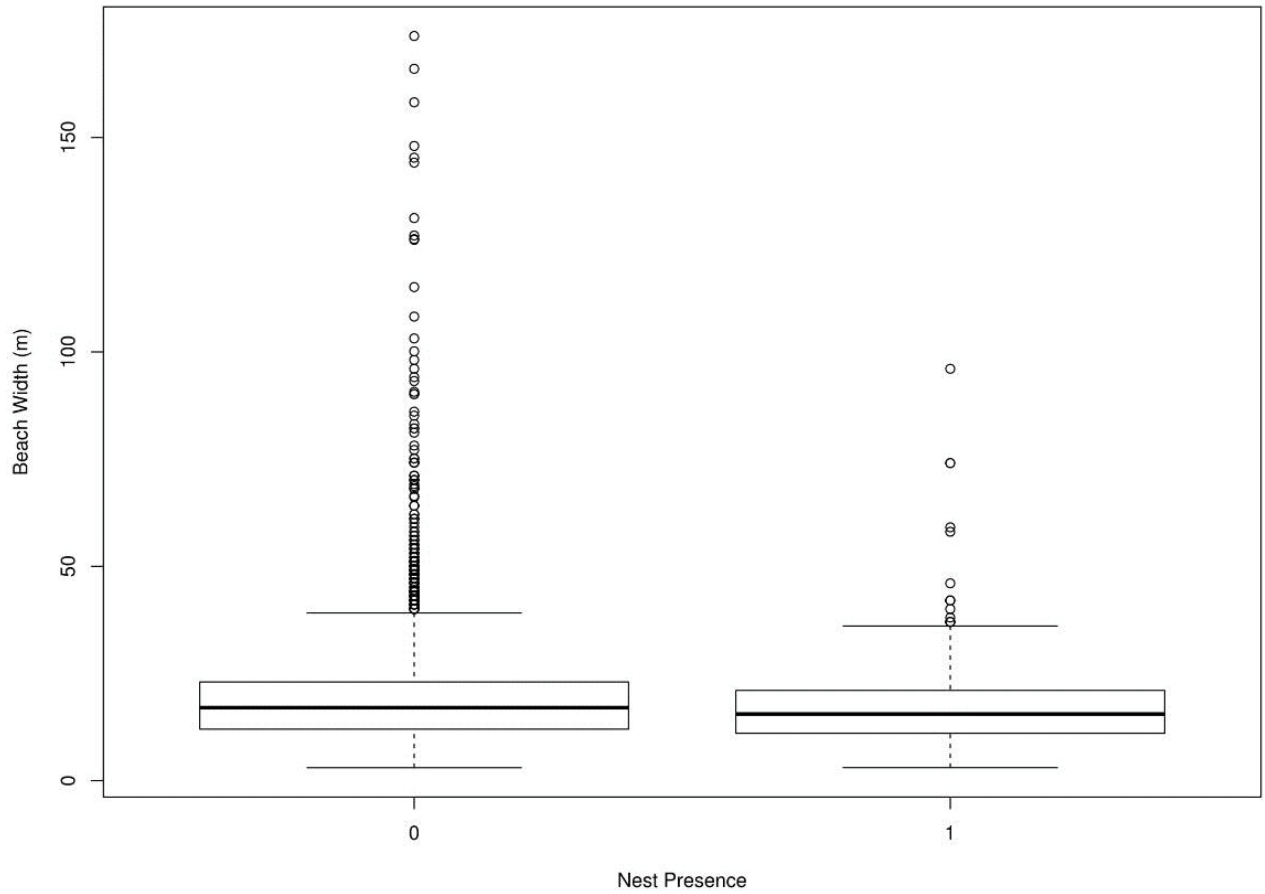

**Figure 6** Boxplot of beach width (m) differentiated by background (0) and nest presence (1) data.

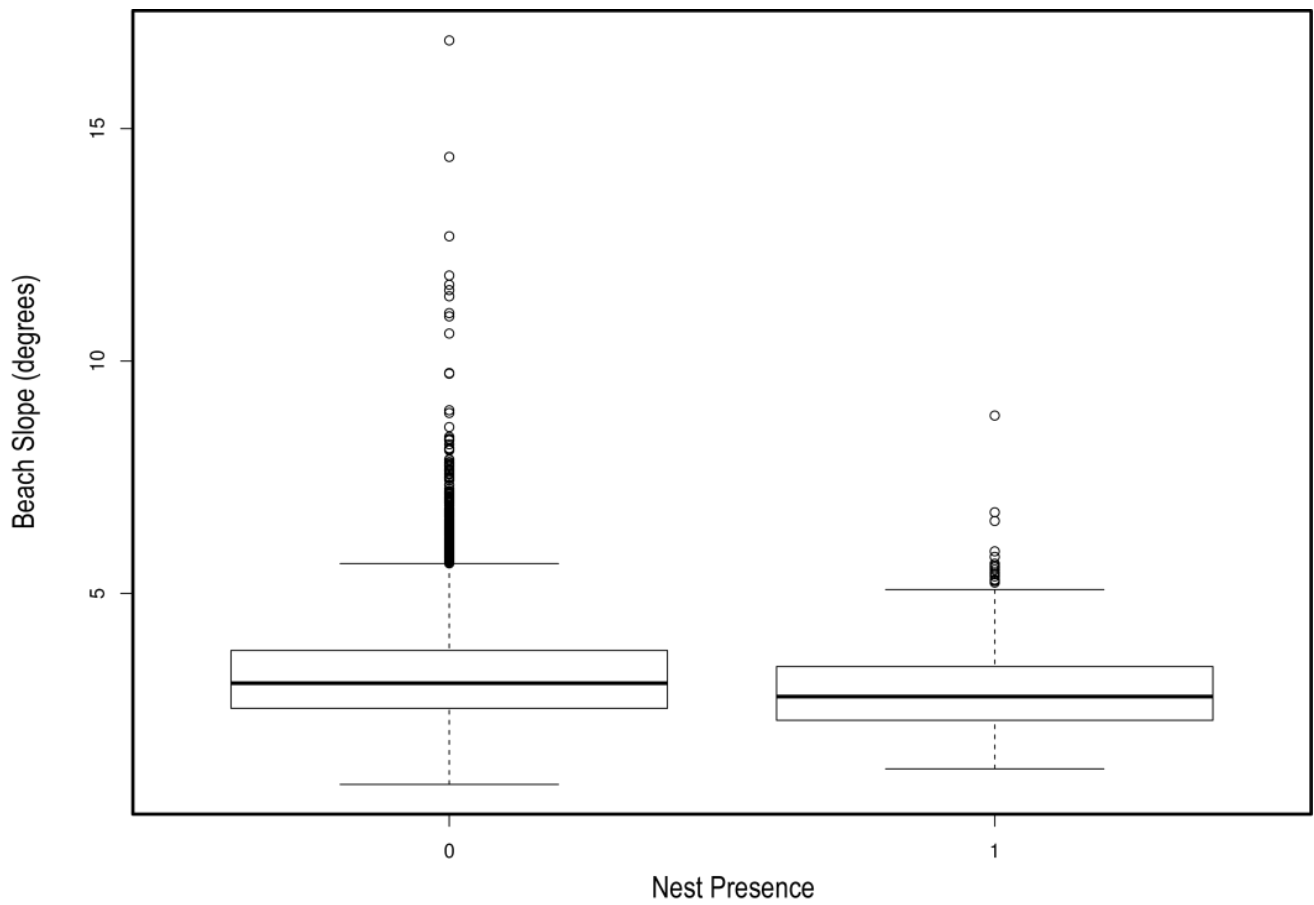

**Figure 7** Boxplot of beach slope (degrees) differentiated by background (0) and nest presence (1) data.

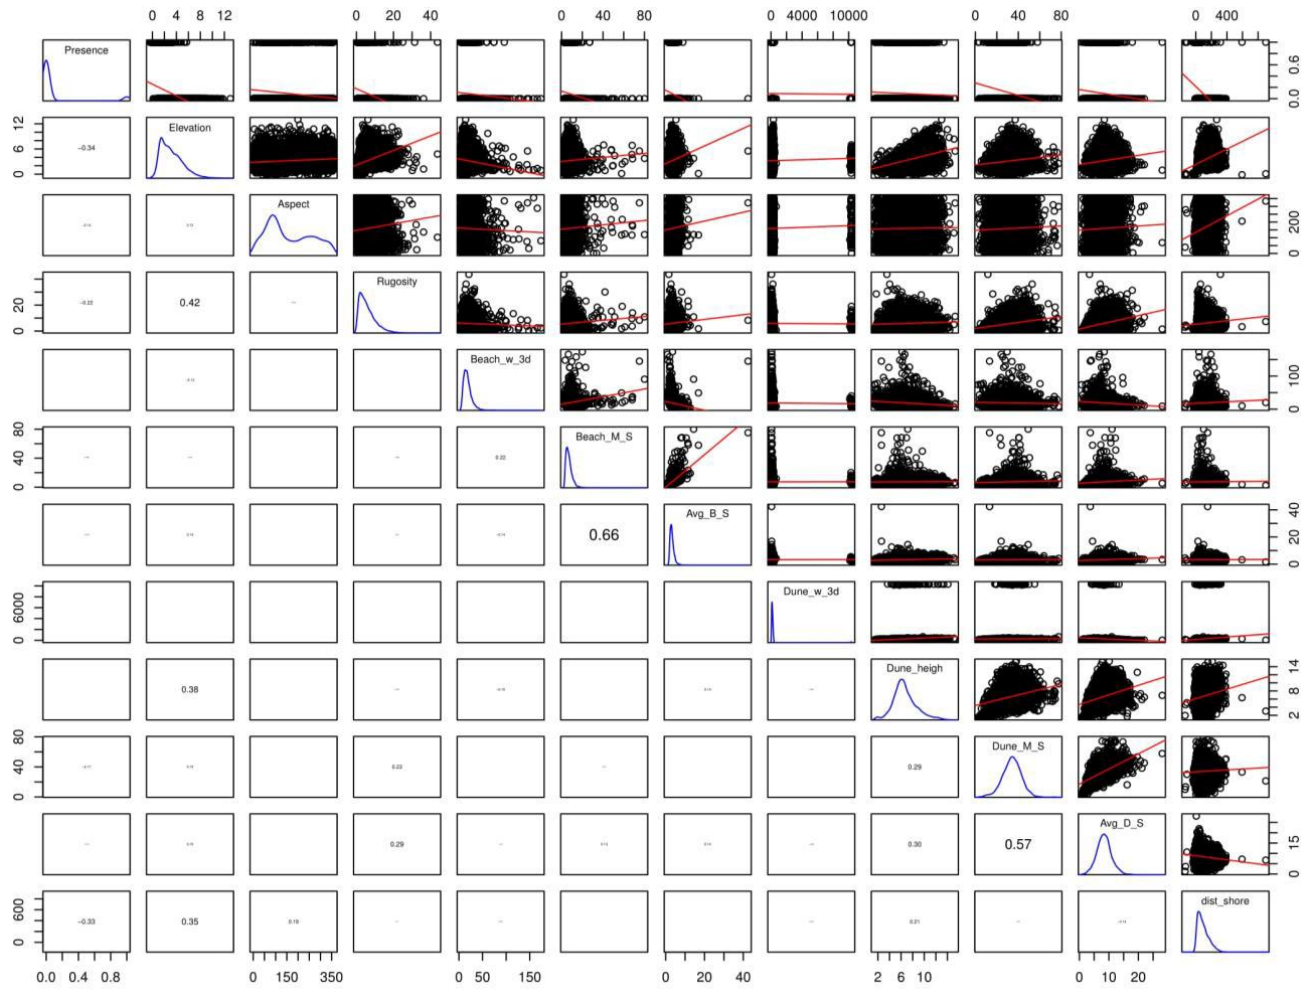

**Figure 8** Correlation matrix showing pairwise scatterplots (upper right) and Pearson correlation coefficients (lower left) for each pair of geomorphic variables for all years combined.

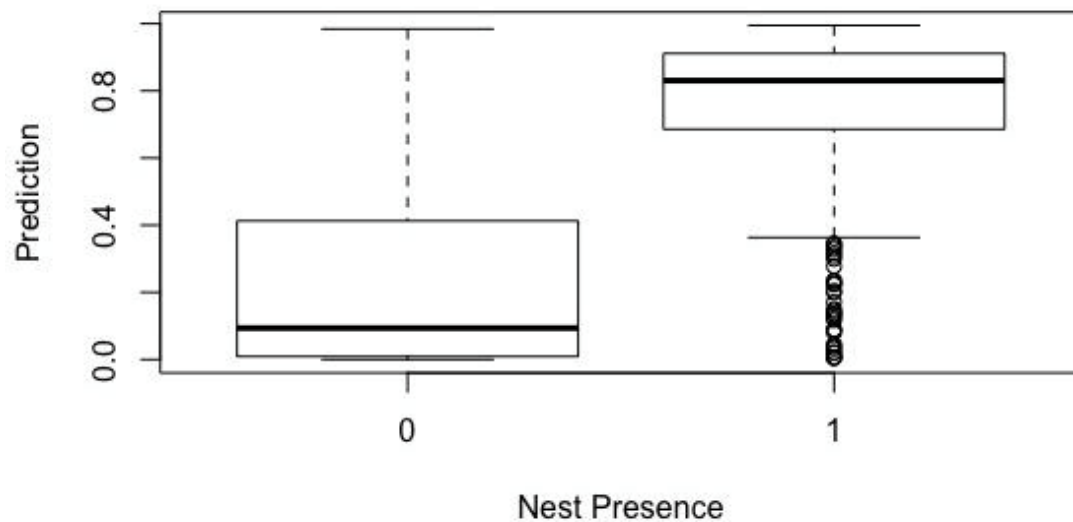



**Figure 9** Boxplot of the predictions of Model 1 in Table 2 (of the manuscript) differentiated by nest presence.

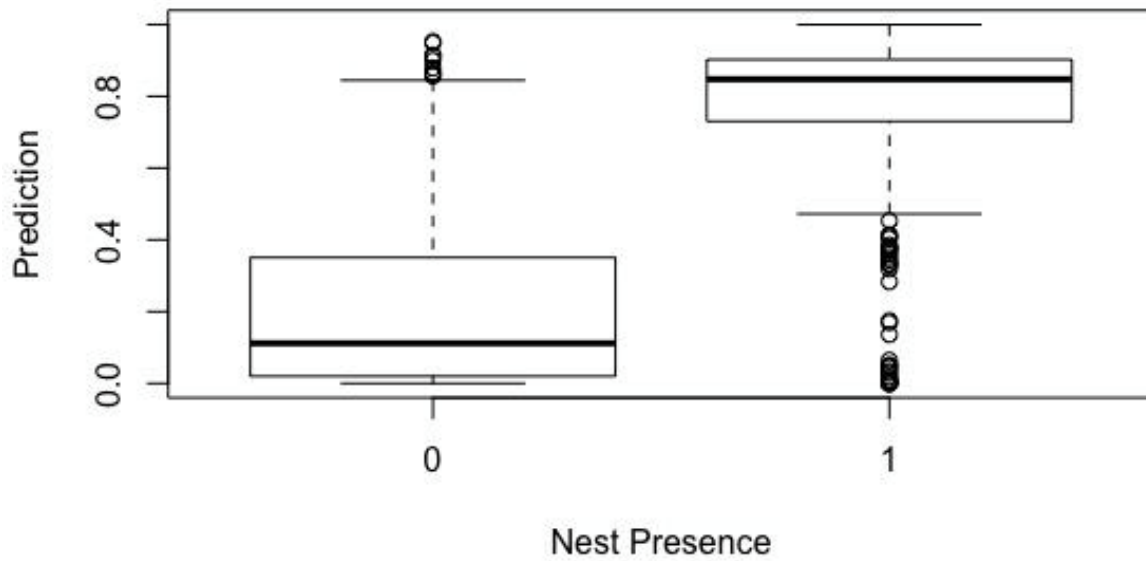

**Figure 10** Boxplot of the predictions of the Model 2 in Table 2 differentiated by nest presence.

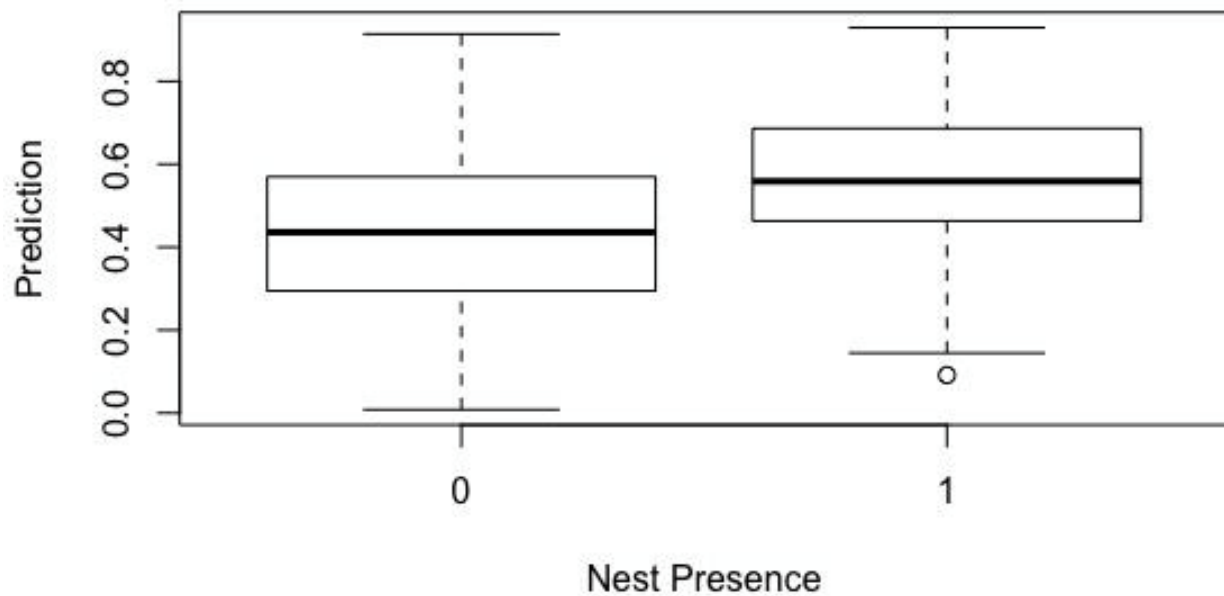

**Figure 11** Boxplot of the predictions of the Model 3 in Table 2, which excludes elevation and distance from shoreline, differentiated by nest presence.

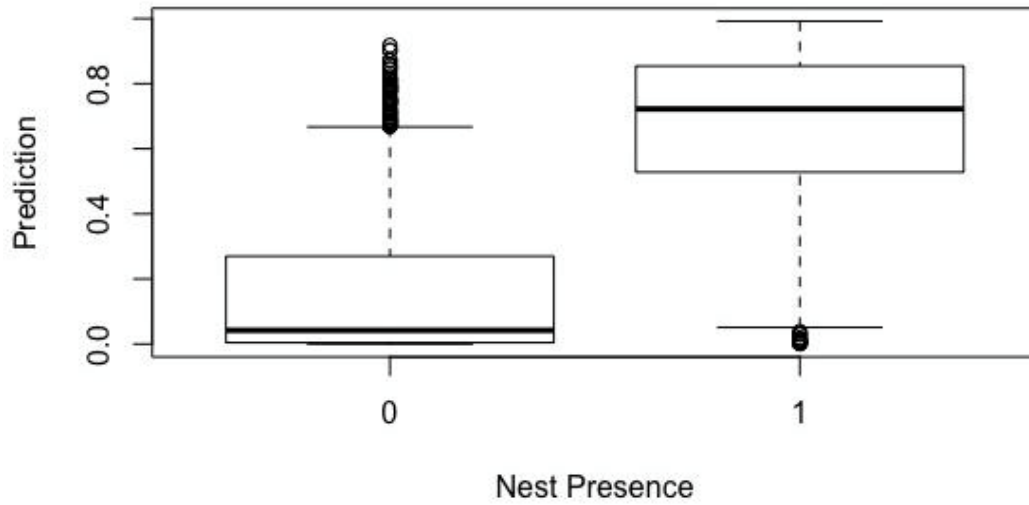

**Figure 12** Boxplot of the predictions of Model 4 in Table 2, which was generated using a 2:1 ratio of background to presence points, differentiated by nest presence.

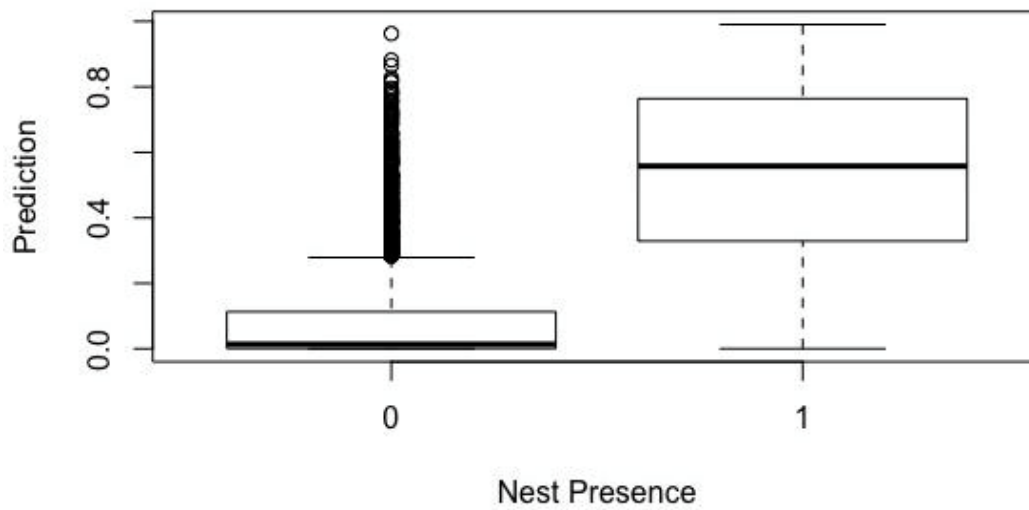

**Figure 13** Boxplot of the predictions of Model 5 in Table 2, which was generated using a 5:1 ratio of background to presence points, differentiated by nest presence.

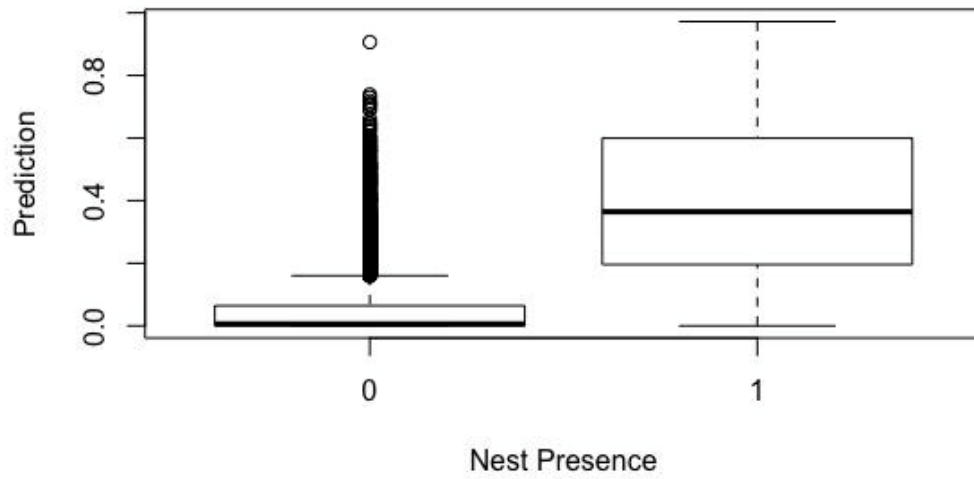

**Figure 14** Boxplot of the predictions of Model 6 in Table 2, which was generated using a 10:1 ratio of background to presence points, differentiated by nest presence.

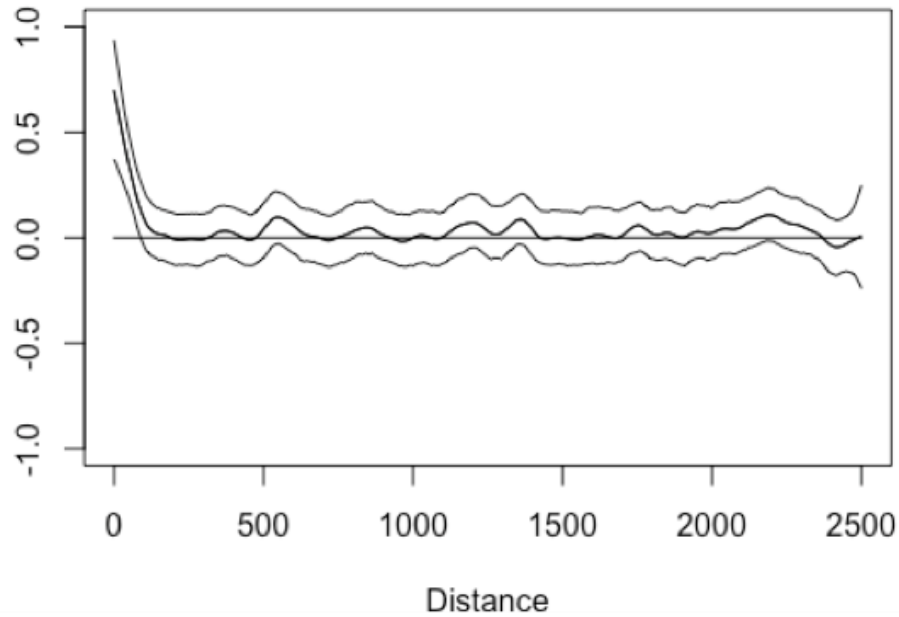

**Figure 15** Spline correlogram of the raw data with 95% pointwise bootstrap confidence intervals.

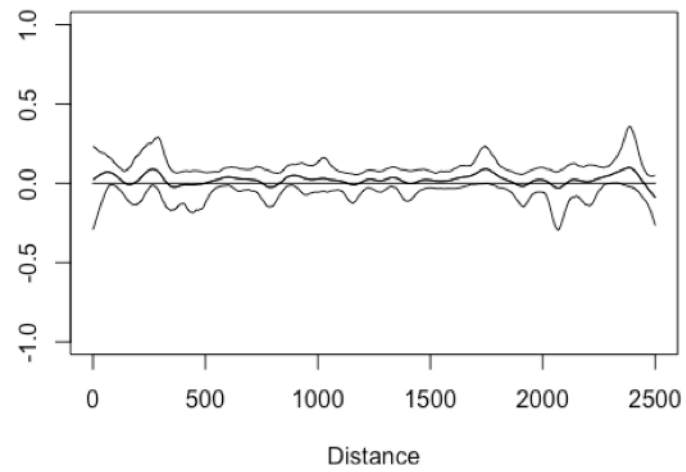

**Figure 16** Spline correlogram of the residuals of the GLM with 95% pointwise bootstrap confidence intervals.
